# Supplementary material
Source: publisher figshare collection journal article supplement (https://acs.figshare.com/ndownloader/files/4693555)

## Supporting Information

### ➤ Thermogravimetric Analysis :

**Figure S1:** A thermogravimetric analysis of complex [Tb(Htpabn)], 6H<sub>2</sub>O displays the first weight loss of 12.16% between 30 and 110°C corresponding of the loss of the 6 H<sub>2</sub>O molecules (calculated : 12.10%). Then the decomposition of the complex starts above 250°C.

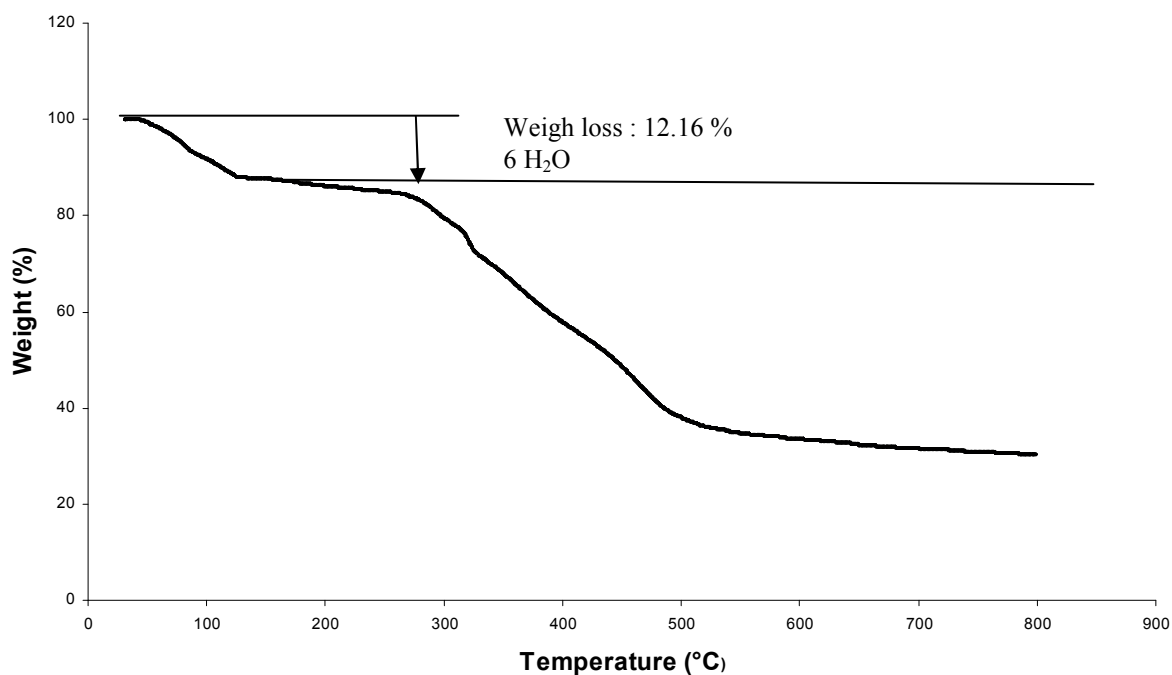

**Figure S2:** View of the two-dimensional hydrogen-bonded framework formed by the water molecules situated in the (10-1) plane; the O...O distances up to 2.81 Å are shown by solid lines.

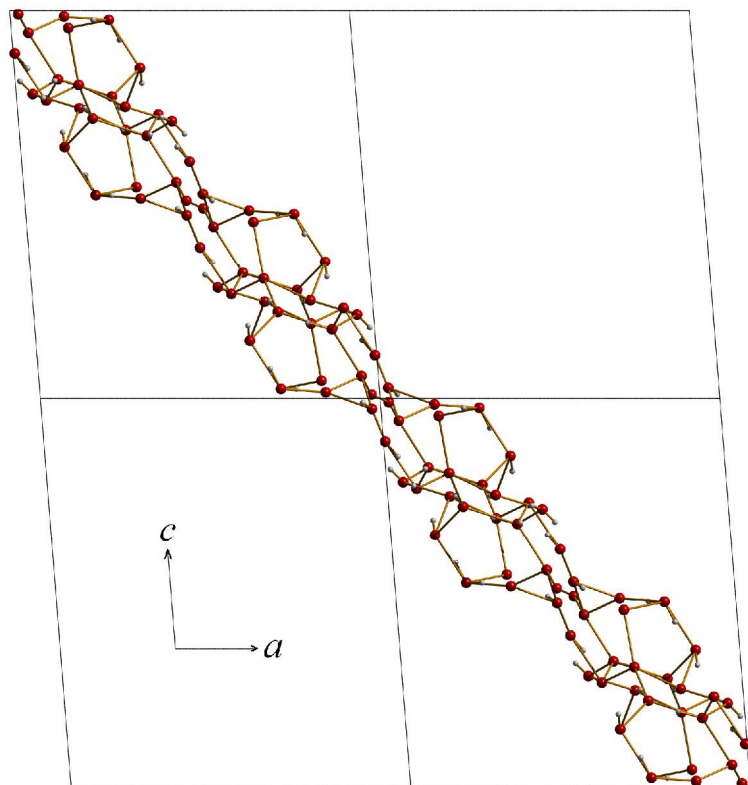

**Figure S3:** View of the two-dimensional framework formed by the water molecules along the a-c diagonale.

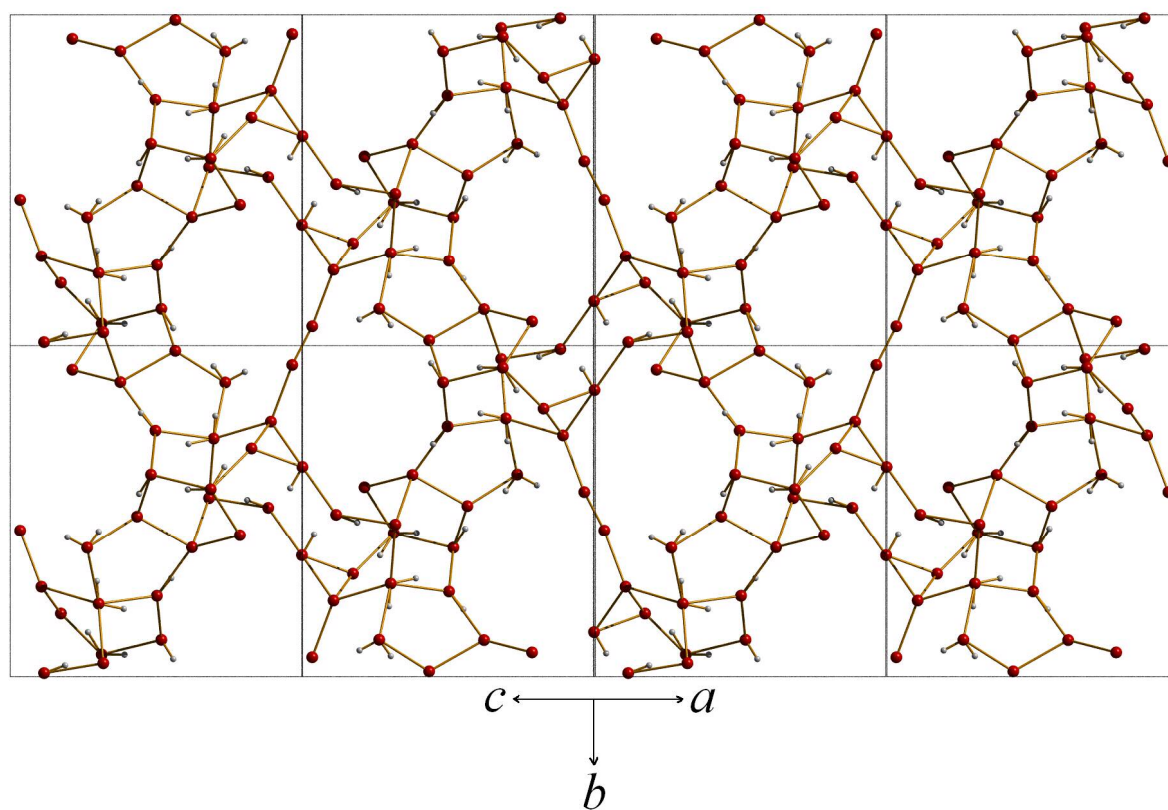

Supplement: Supplementary file 1 [file 4693555]
